# Supplementary material for: Disrupting fumarylacetoacetate hydrolase by stratified nanoplatforms orchestrated metabolic-immune reprogramming and prevent post-ablation HCC relapse
Source: Research Square preprint supplement (doi:10.21203/rs.3.rs-8119286/v1), 2025-12-04
Supplement: Supplementary file 1 [file d075e1e0c480aa52578f69c6.pdf]

**Article**

**Disrupting fumarylacetoacetate hydrolase by stratified nanoplatfoms orchestrated metabolic-immune reprogramming and prevent post-ablation HCC relapse**

Zhiwen Hong<sup>#, 1</sup>, Xiaolong Liu<sup>#, 2</sup>, Rouhan A<sup>#, 1</sup>, Zengzhen Chen<sup>#, 3</sup>, Qianjiang Wu<sup>1</sup>, Jixian Fu<sup>1, 4</sup>, Xue Guan<sup>5</sup>, Can Wang<sup>6</sup>, Xinghua Wang<sup>1</sup>, Shan Jiang<sup>1</sup>, Bolong Li<sup>1</sup>, Zhaobo Wang<sup>1</sup>, Lei Zhang<sup>\*, 7</sup>, Xianwei Meng<sup>\*, 3</sup>, Yali Cui<sup>\*, 1</sup>, Tengchuang Ma<sup>\*, 1</sup>.

**Affiliations:**

<sup>1</sup> Department of Nuclear Medicine, Harbin Medical University Cancer Hospital, Harbin 150081, China.

<sup>2</sup> Department of Interventional Radiology, Harbin Medical University Cancer Hospital, Harbin 150081, China.

<sup>3</sup> State Key Laboratory of Cryogenic Science and Technology, Technical Institute of Physics and Chemistry, Chinese Academy of Sciences, Beijing, 100190, China.

<sup>4</sup> Department of Interventional Radiology, the First Hospital of China Medical University, Shenyang, 110001, China.

<sup>5</sup> Animal Laboratory Center, The Second Affiliated Hospital of Harbin Medical University, Harbin 150081, China.

<sup>6</sup> Department of Gynecologic Oncology, Harbin Medical University Cancer Hospital Harbin, Heilongjiang 150081, China.

<sup>7</sup> Department of Interventional Ultrasound, Harbin Medical University Cancer Hospital, Harbin 150081, China.

<sup>#</sup> These authors contributed equally: Zhiwen Hong, Xiaolong Liu, Rouhan A, Zengzhen Chen

<sup>\*</sup> Corresponding author: Tengchuang Ma; Yali Cui; Xianwei Meng; Lei Zhang.

**\* Email:**

matengchuang1988@126.com (T. M.);

yalicui68@126.com (Y. C.);

mengxw@mail.ipc.ac.cn (X. M.);

tianwang.3000@163.com (L. Z.).

**Keywords:**

microwave ablation therapy; metabolic-immune reprogramming; hepatocellular carcinoma recurrence; nano deliver systems.

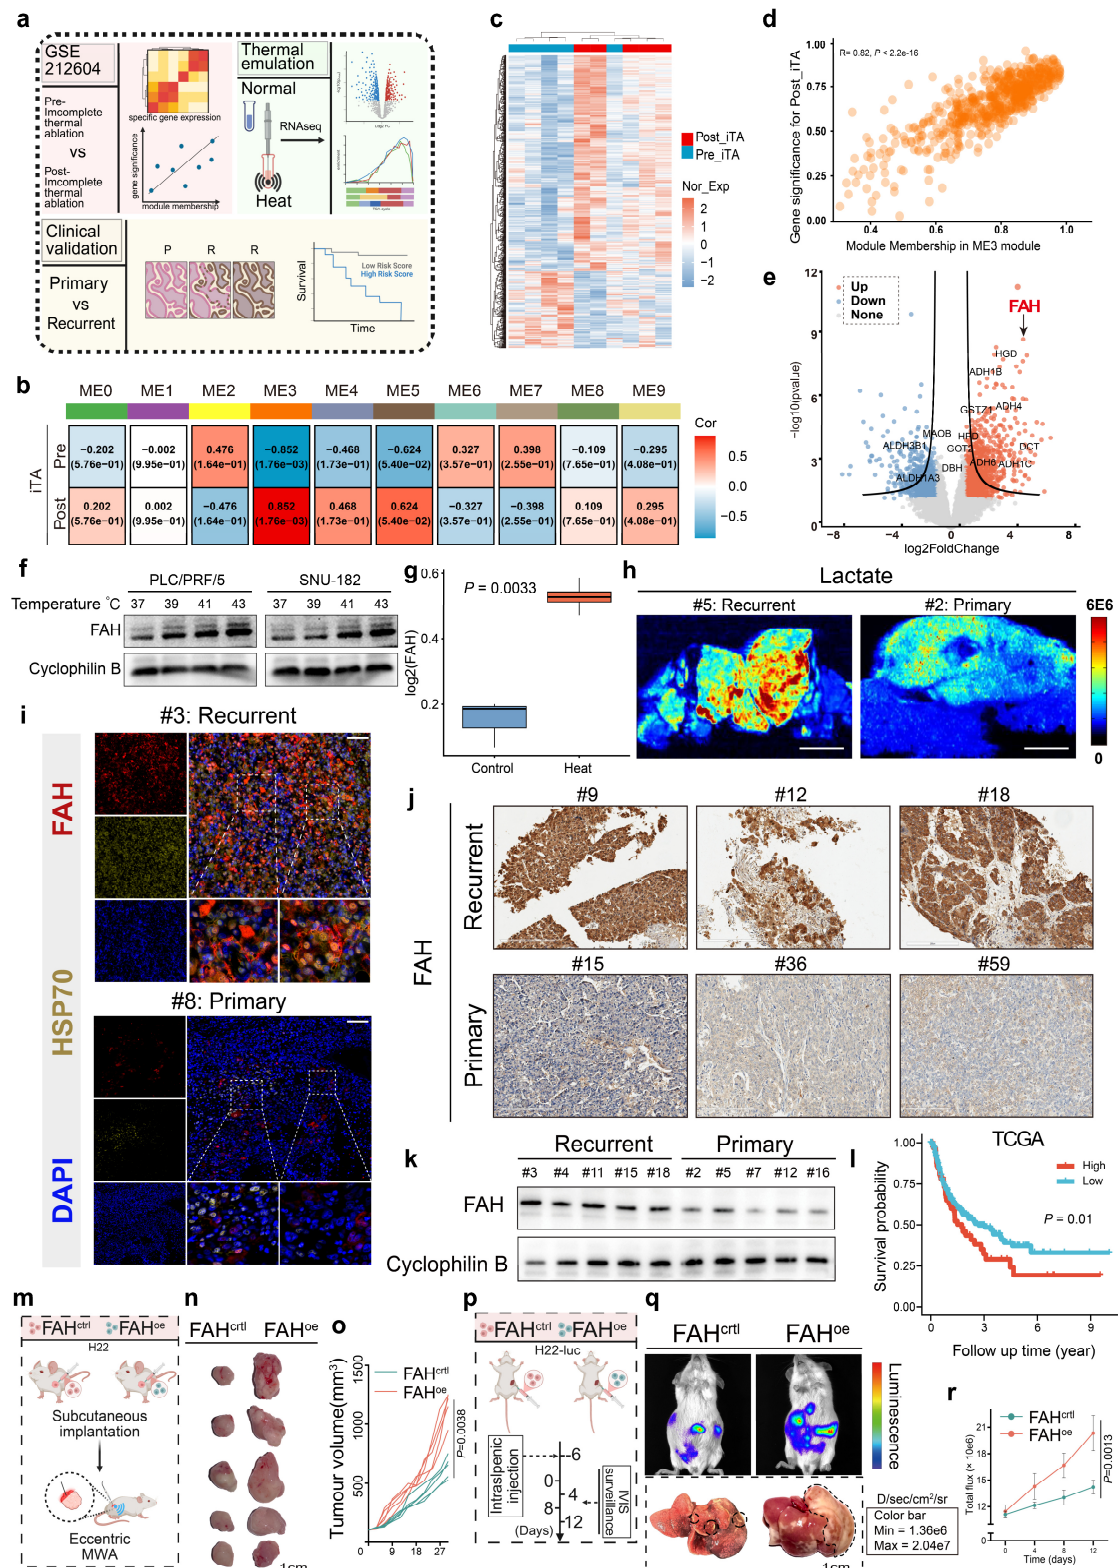

34  
35 Extended Data Fig. 1 | Thermal ablation induces FAH upregulation and promotes HCC  
36 recurrence

37 **a.** Schematic of candidate gene screening strategy using GSE212604, clinical samples and heat-  
38 treated cell lines.

39 **b.** Correlation between gene modules and microwave ablation response identified by WGCNA

(GEO: GSE212604).

**c.** Expression of selected genes from module ME3, stratified by pre- and post-incomplete microwave ablation status.

**d.** Correlation between gene significance and module membership in ME3 ( $R = 0.82$ ).

**e.** Volcano plot of differentially expressed genes pre- versus post-MWA in HCC patients, highlighting significant FAH upregulation.

**f.** Western blot analysis of FAH protein expression in PLC/PRF/5 and SNU-182 cells under escalating thermal stress (37 °C to 43 °C).

**g.** RNA-seq quantification of FAH expression in control (37 °C) versus heat-treated (43 °C) cells.

**h.** Representative mass spectrometry images showing spatial lactate distribution in cohort 1. Scale bar, 2 mm.

**i.** Immunofluorescence co-staining of FAH and HSP70 in clinical HCC specimens (cohort 2). Scale bars, 50  $\mu$ m.

**j.** Representative IHC staining of FAH in primary and recurrent HCC tissues (cohort 3). Scale bars, 200  $\mu$ m ( $n = 108$ ).

**k.** Western blot analysis of FAH expression in primary and recurrent HCC tissues (cohort 4;  $n = 3$  biological replicates).

**l.** Kaplan–Meier survival analysis of TCGA-LIHC cohort stratified by FAH expression, showing poorer prognosis with high FAH.

**m.** Schematic of the relapse HCC model in BALB/c mice using FAH-overexpression (FAH<sup>oe</sup>) and control (FAH<sup>ctrl</sup>) H22 cells.

**n, o.** Representative tumour images (**n**) and growth curves (**o**) of the relapse model groups. Scale bars, 1 cm ( $n = 5$  mice per group).

**p.** Schematic of the HCC model established via intrasplenic injection of FAH<sup>oe</sup> and FAH<sup>ctrl</sup> H22-luc cells in BALB/c mice.

**q, r.** Representative bioluminescence images (**q**) and total flux measurements (**r**) of the intrasplenic HCC model. Scale bars, 1 cm ( $n = 5$  mice per group).

Data are presented as mean  $\pm$  S.D. from  $n$  biologically independent samples (**o, r, n** = 5). Statistical significance was analysed by one-way ANOVA with Sidak's multiple comparisons test for **o, r**.

Panels **a, m, p** created with BioRender.com.

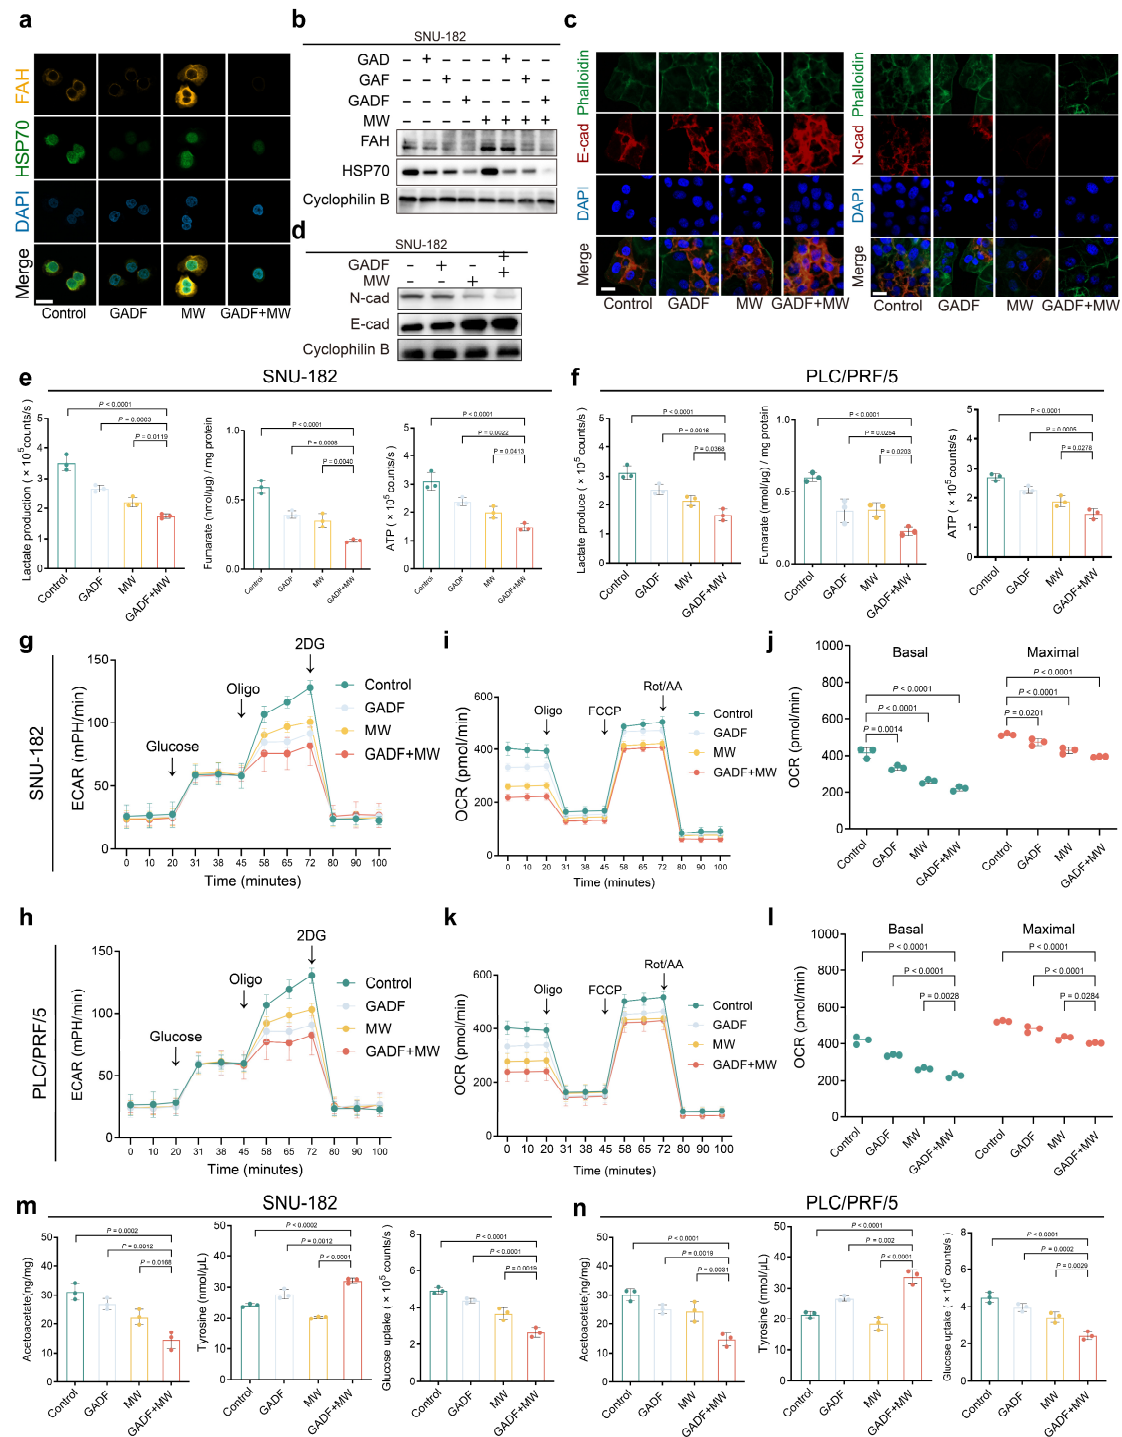

## Extended Data Fig. 2 | Therapeutic mimicry of FAH knockdown via GADF induces metabolic reprogramming

**a.** Immunofluorescence images of FAH and HSP70 in SNU-182 cells across four treatment groups (Control, GADF, MW, GADF + MW). Scale bar, 20  $\mu\text{m}$  ( $n = 3$  biological replicates).

**b.** Protein expression levels of FAH and HSP70 in SNU-182 cells under eight treatment conditions (Control, GAD, GAF, GADF, MW, GAD + MW, GAF + MW, GADF + MW;  $n = 3$  replicates).

**c.** Immunofluorescence images of E-cadherin and N-cadherin in SNU-182 cells (Control, GADF, MW, GADF + MW). Scale bar, 20  $\mu\text{m}$  ( $n = 3$  replicates).

**d.** Protein expression levels of N-cadherin and E-cadherin in SNU-182 cells across indicated groups



( $n = 3$  replicates).

**e, f.** Lactate production, intracellular fumarate concentration and ATP production rates in SNU-182 (**e**) and PLC/PRF/5 (**f**) cells under different treatments.

**g.** ECAR of SNU-182 cells across indicated treatments.

**h.** ECAR of PLC/PRF/5 cells under indicated conditions.

**i.** OCR of SNU-182 cells under different treatments.

**j.** Basal and maximal OCR rates in SNU-182 cells across indicated groups.

**k.** OCR of PLC/PRF/5 cells under indicated treatments.

**l.** Basal and maximal OCR in PLC/PRF/5 cells across indicated groups.

**m, n.** Concentrations of acetoacetate and tyrosine, and glucose uptake rate in SNU-182 (**m**) and PLC/PRF/5 (**n**) cells from the indicated groups.

Data are presented as mean  $\pm$  S.D. from  $n$  biologically independent samples (**e, f, j, l, m, n**;  $n = 3$ ).

Statistical significance was analysed by one-way ANOVA with Dunnett's multiple comparisons test for **e, f, m, n** and two-way ANOVA with Dunnett's test for **j, l**. ns, not significant. Dunnett's test compared each group against the last group.

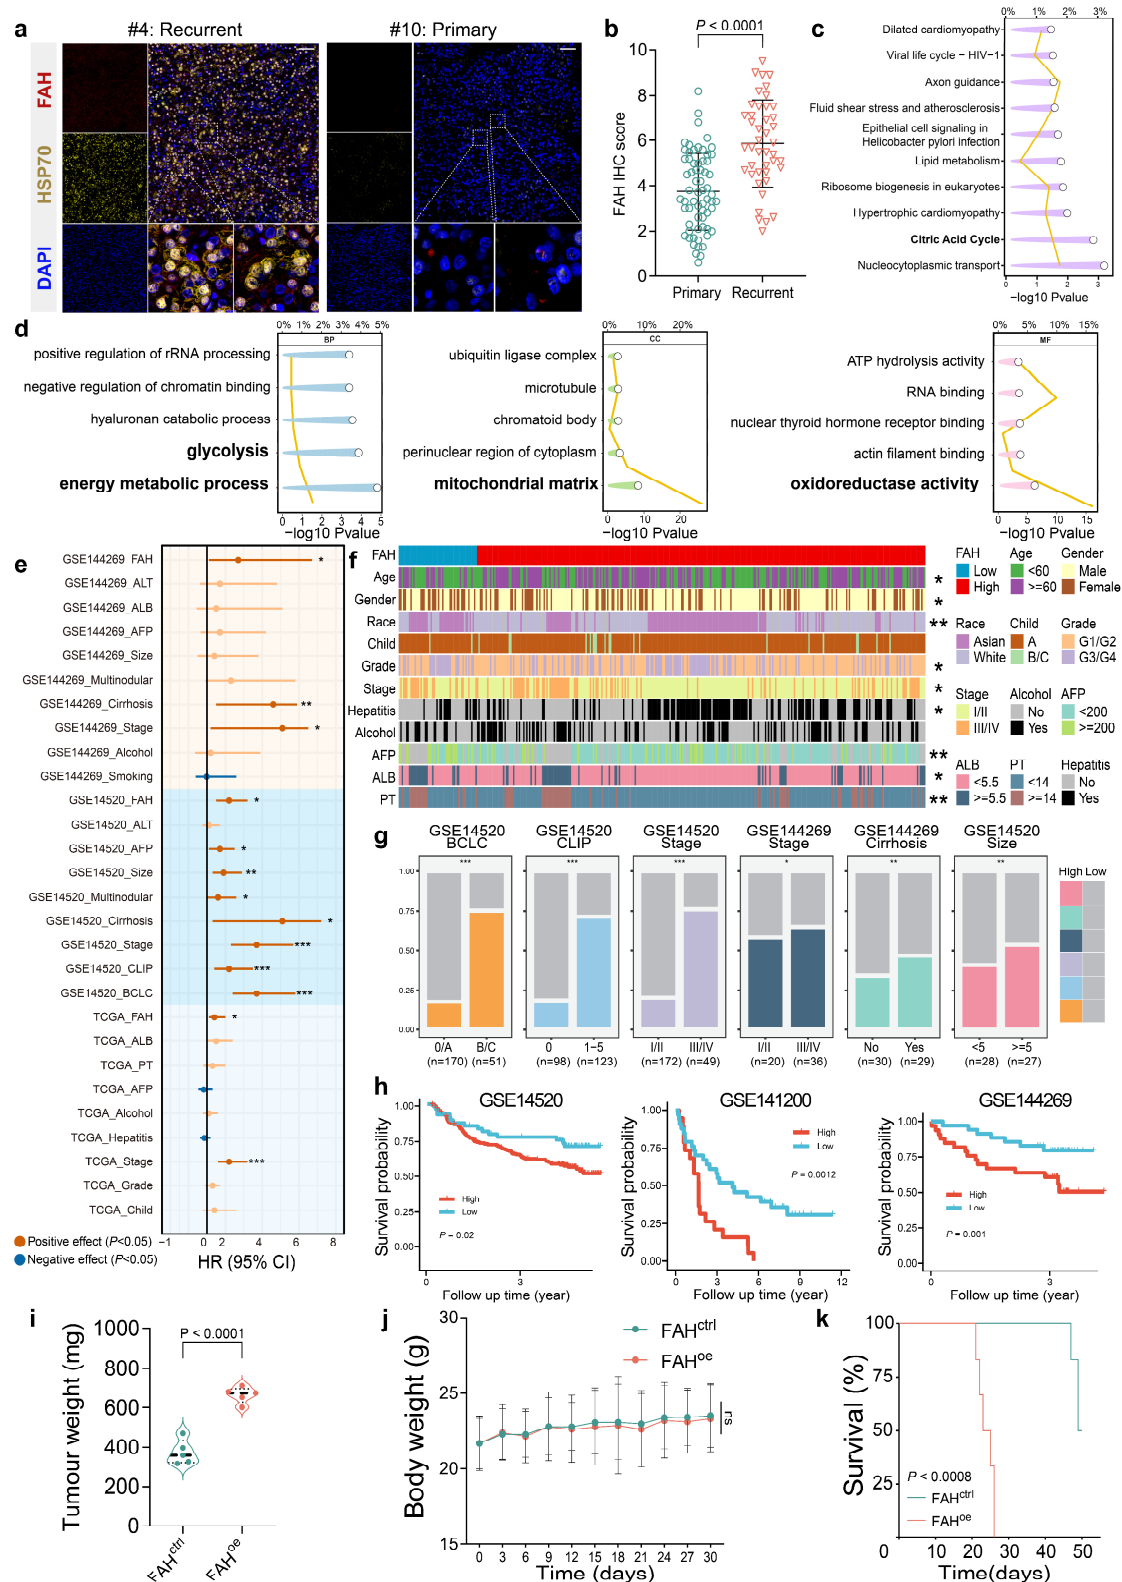

**Supplementary Fig. 1 | Thermal ablation induces FAH upregulation and is associated with poor outcomes in HCC. Related to Extended Data Fig. 1.**

**a**, Representative co-immunofluorescence images of FAH and HSP70 in human HCC specimens from Cohort 2. Scale bars, 50  $\mu$ m.

**b**, IHC score of FAH expression corresponding to Extended Data Fig. 1j.

**c, d**, Pathway enrichment analysis of RNA-seq data showing cancer-related biological pathways and metabolic processes. KEGG pathways are presented in **(c)**, and GO biological processes in **(d)**. **e**, Cox univariate regression analysis of risk factors in hepatocellular carcinoma patients across multiple cohorts (TCGA, GSE144269, GSE14520). **f, g**, Comparison of clinical characteristics among HCC patients in the GSE14520 and GSE144269 datasets **(f)**, with corresponding quantitative analysis **(g)**. **h**, Kaplan-Meier survival analysis based on FAH expression levels in the GSE14520, GSE141200, and GSE144269 cohorts. **i**, Terminal tumour weights from the indicated treatment groups in the relapse model (related to Extended Data Fig. 1m). **j**, Body weight curves of mice in the indicated treatment groups (related to Extended Data Fig. 1m). **k**, Kaplan-Meier survival curves of mice in the indicated treatment groups (related to Extended Data Fig. 1m). Data are presented as mean  $\pm$  s.d. from  $n$  biologically independent samples (**b**,  $n = 108$ ; **i-k**,  $n = 5$ ). Statistical significance was analysed by two-tailed Student's  $t$ -test for **b, i**, one-way ANOVA with Šídák's multiple comparisons test for **j**, and log-rank test for **k**. ns, not significant.  $P < 0.05$ ,  $*P < 0.01$ ,  $**P < 0.001$ .

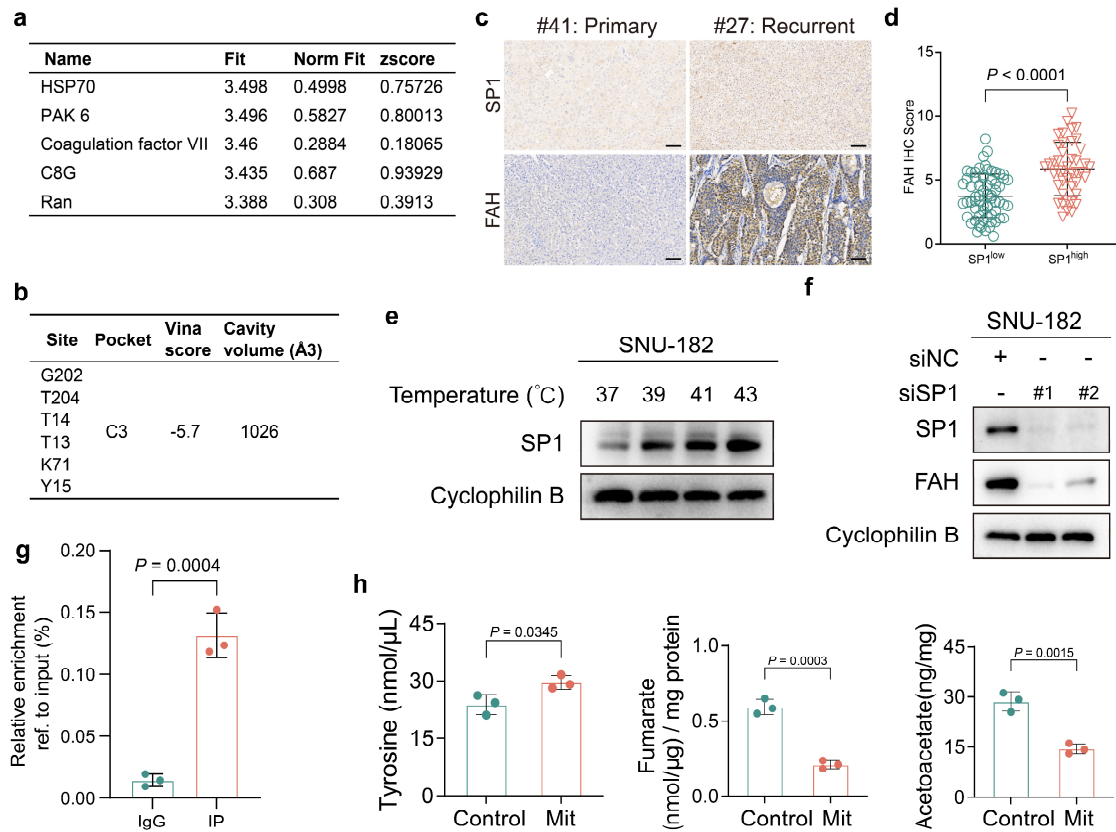

**Supplementary Fig. 2 | Increased fumarate induced by SP1-FAH transcriptional regulation binds to and protects HSP70. Related to Fig. 2.**

**a**, Potential fumarate-binding candidates predicted using the PharmMapper Server.

**b**, Predicted binding pocket between fumarate and HSP70.

**c, d**, Representative IHC staining of FAH and SP1 in Cohort 3 (**c**), and IHC scores of FAH stratified by SP1 expression levels (**d**). Scale bars, 60 μm.

**e**, Protein expression levels of SP1 in SNU-182 cells subjected to incremental hyperthermia (37–43 °C).  $n = 3$  independent biological replicates.

**f**, Protein expression levels of FAH in SNU-182 cells following SP1 knockdown.  $n = 3$  independent biological replicates.

**g**, ChIP-qPCR quantification of SP1 binding to the FAH promoter region in SNU-182 cells.

**h**, Concentrations of tyrosine, fumarate and acetoacetate in SNU-182 cells after SP1 inhibition with mithramycin A (Mit, 1 μM).

Data are presented as mean ± s.d. from  $n$  biologically independent samples (**d**,  $n = 108$ ; **g, h**,  $n = 3$ ).

Statistical significance was analysed by two-tailed Student's  $t$ -test for **d, g, h**.

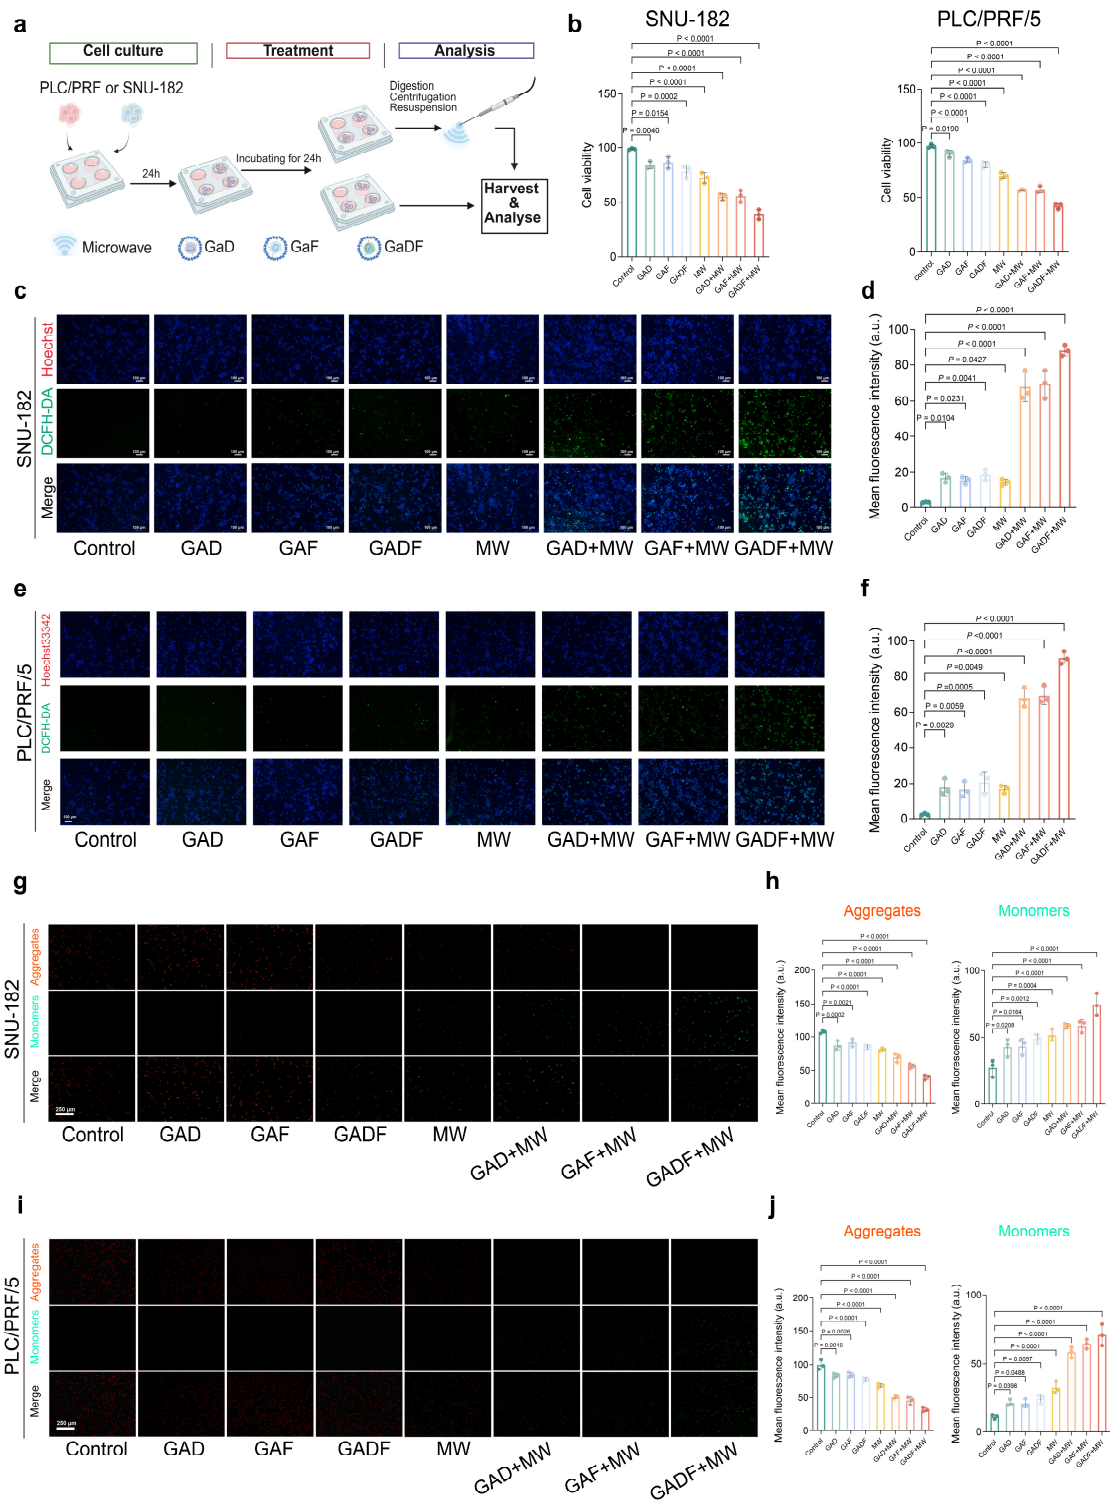

**Supplementary Fig. 3 | GADF suppresses tumour growth and combined treatment eradicates HCC cells in vitro. Related to Fig. 3.**

**a**, Schematic of the in vitro validation workflow using SNU-182 and PLC/PRF/5 cell lines. Treatment concentration was  $10 \mu\text{g ml}^{-1}$ . Groups: Control, GAD, GAF, GADF, MW, GAD + MW, GAF + MW, GADF + MW.

**b**, Cell viability (CCK-8 assay) of SNU-182 and PLC/PRF/5 cells across the indicated groups.

**c**, Representative DCFH-DA staining images indicating ROS levels in SNU-182 cells across groups. Scale bar,  $100 \mu\text{m}$ .  $n = 3$  independent biological replicates.

**d**, Quantitative analysis of mean DCFH-DA fluorescence intensity in SNU-182 cells.  
**e**, Representative DCFH-DA staining images for ROS in PLC/PRF/5 cells. Scale bar, 100  $\mu\text{m}$ .  $n = 3$  independent biological replicates.  
**f**, Quantitative analysis of mean DCFH-DA fluorescence intensity in PLC/PRF/5 cells.  
**g**, Representative JC-1 fluorescence staining images indicating mitochondrial membrane potential ( $\Delta\Psi\text{m}$ ) in SNU-182 cells; red fluorescence represents JC-1 aggregates (high  $\Delta\Psi\text{m}$ ), green represents monomers (low  $\Delta\Psi\text{m}$ ). Scale bar, 250  $\mu\text{m}$ .  $n = 3$  independent biological replicates.  
**h**, Quantitative analysis of the JC-1 aggregate/monomer ratio in SNU-182 cells.  
**i**, Representative JC-1 staining images for  $\Delta\Psi\text{m}$  in PLC/PRF/5 cells. Scale bar, 250  $\mu\text{m}$ .  $n = 3$  independent biological replicates.  
**j**, Quantitative analysis of the JC-1 aggregate/monomer ratio in PLC/PRF/5 cells.  
Data are presented as mean  $\pm$  s.d. from  $n$  biologically independent samples (**b**, **d**, **f**, **h**, **j**,  $n = 3$ ). Statistical significance was analysed by one-way ANOVA with Dunnett's multiple comparisons test versus the control group. Panel **a** created with BioRender.com.



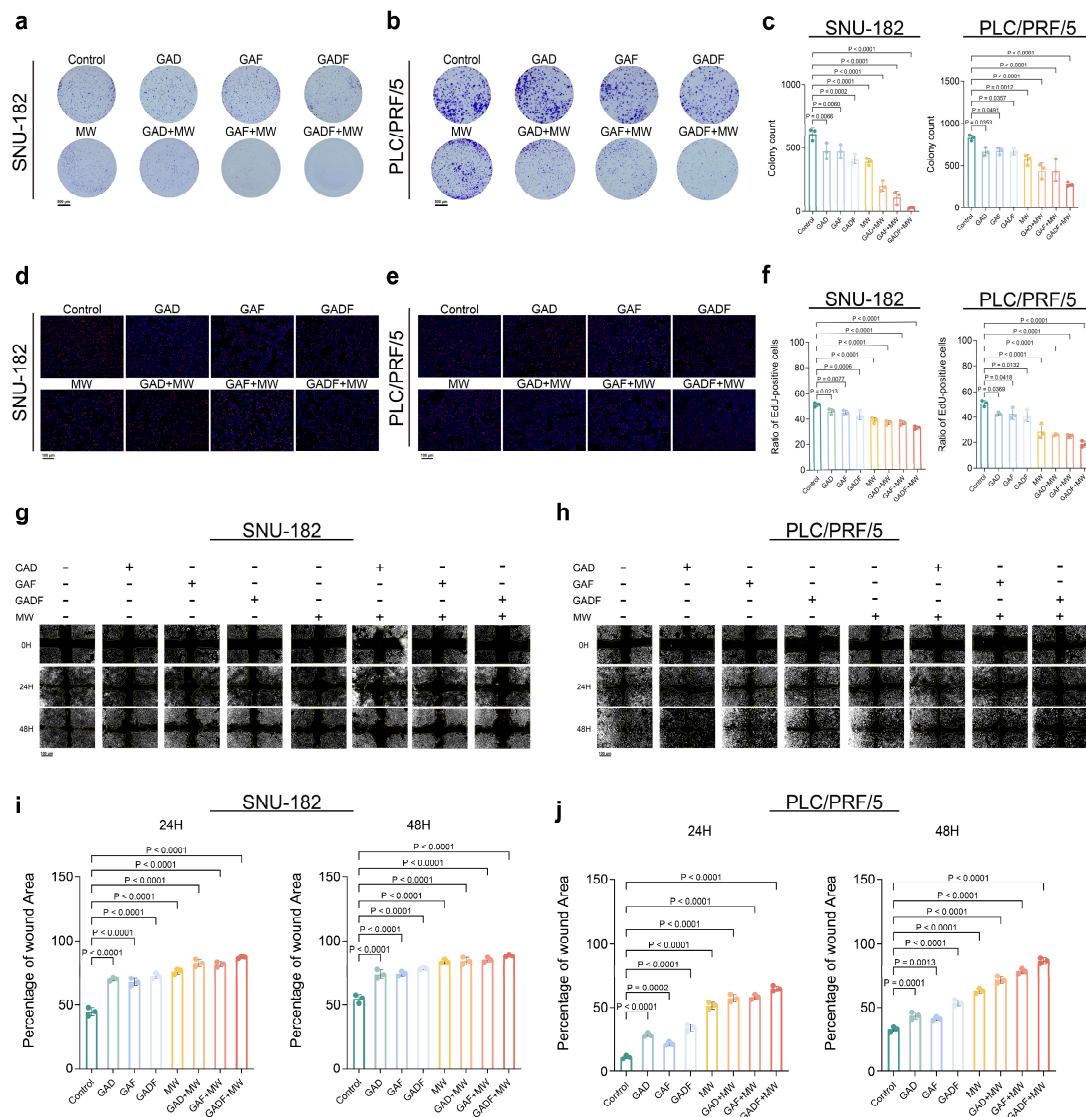

**Supplementary Fig. 4 | GADF-based treatment suppresses tumour invasion capabilities in vitro. Related to Fig. 3.**

**a, b,** Representative images of colony formation assays for SNU-182 (**a**) and PLC/PRF/5 (**b**) cells across indicated groups.  $n = 3$  independent biological replicates.

**c,** Quantitative analysis of colony formation numbers.

**d, e,** Representative EdU staining images of SNU-182 (**d**) and PLC/PRF/5 (**e**) cells. Scale bar, 100  $\mu\text{m}$ .  $n = 3$  independent biological replicates.

**f,** Quantitative analysis of EdU-positive cells.

**g,** Representative images from wound-healing assays of SNU-182 cells at 0, 24, and 48 h.  $n = 3$  independent biological replicates.

**h,** Representative wound-healing assays of PLC/PRF/5 cells.  $n = 3$  independent biological replicates.

**i,** Quantitative analysis of wound closure area for SNU-182 cells (24 h vs. 0 h, 48 h vs. 24 h).

**j,** Quantitative analysis of wound closure area for PLC/PRF/5 cells.

Data are presented as mean  $\pm$  s.d. from  $n$  biologically independent samples (**c, f, i, j,  $n = 3$** ).

Statistical significance was analysed by one-way ANOVA with Dunnett's multiple comparisons test versus the control group.

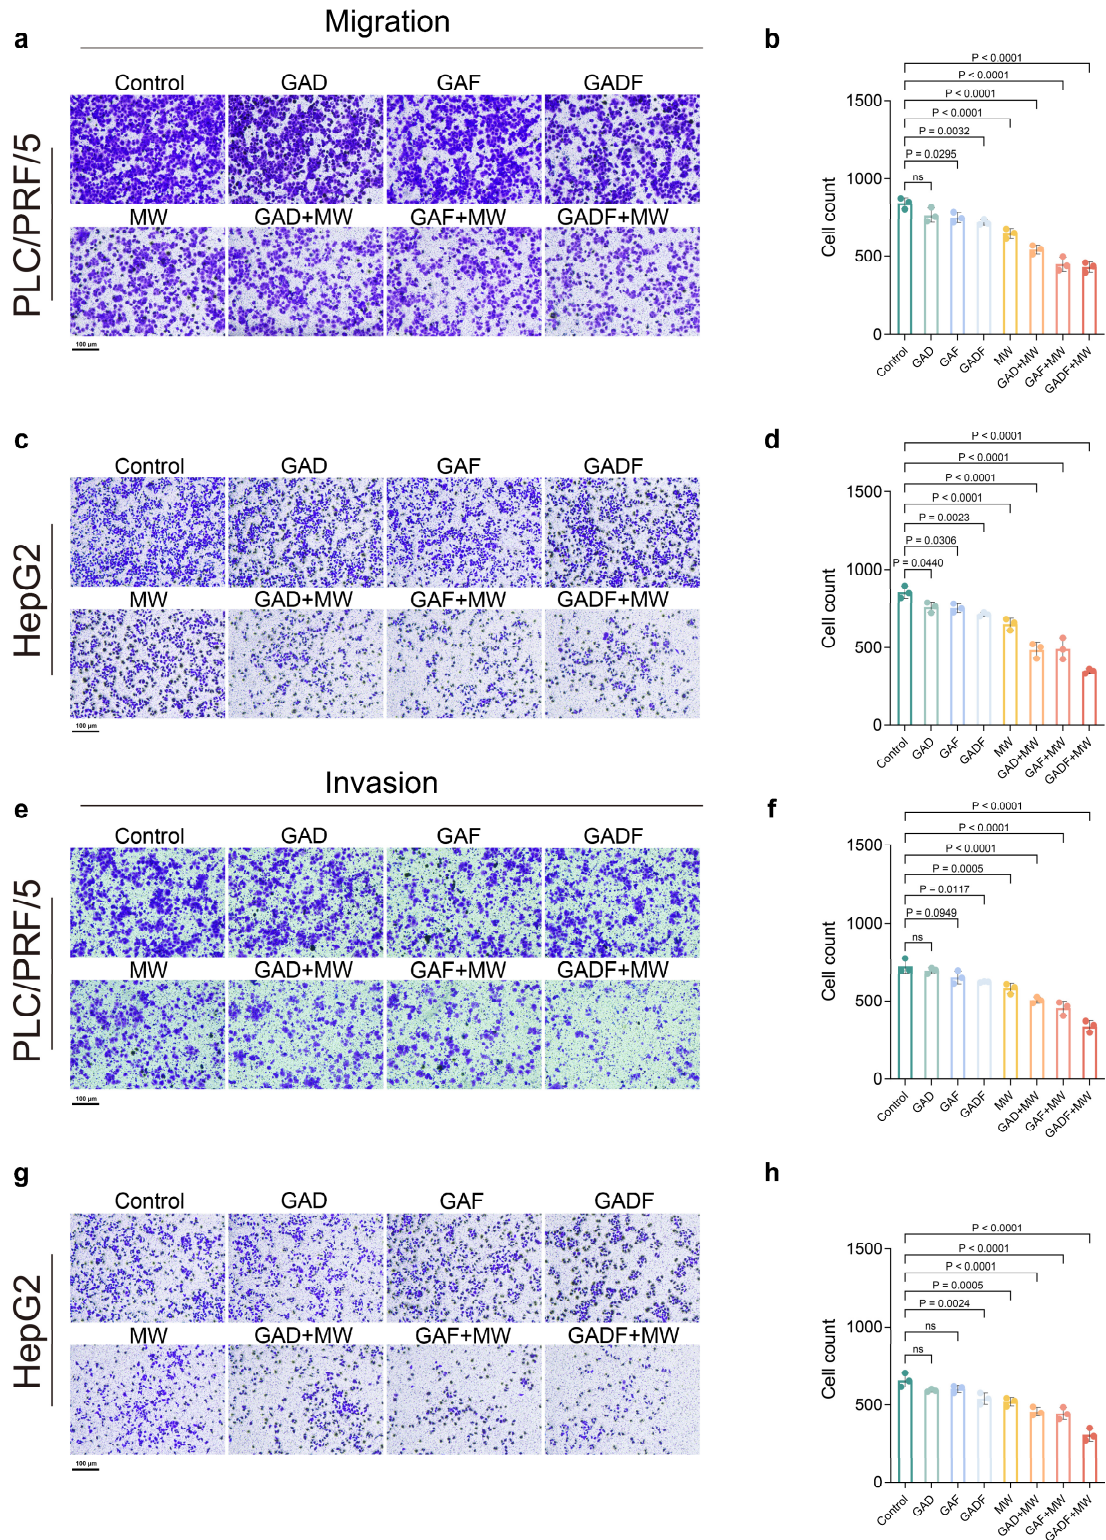

**Supplementary Fig. 5 | GADF-based treatment suppresses tumour migration capabilities in vitro. Related to Fig. 3.**

**a, b,** Representative images (**a**) and quantitative analysis (**b**) of migrated PLC/PRF/5 cells. Scale bar, 50  $\mu\text{m}$ .  $n = 3$  independent biological replicates.

**c, d,** Representative images (**c**) and quantification (**d**) of migrated HepG2 cells. Scale bar, 50  $\mu\text{m}$ .  $n = 3$  independent biological replicates.

**e, f**, Representative images (**e**) and quantification (**f**) of invaded PLC/PRF/5 cells. Scale bar, 50  $\mu\text{m}$ .  $n = 3$  independent biological replicates.

**g, h**, Representative images (**g**) and quantification (**h**) of invaded HepG2 cells. Scale bar, 50  $\mu\text{m}$ .  $n = 3$  independent biological replicates.

Data are presented as mean  $\pm$  s.d. from  $n$  biologically independent samples (**b, d, f, h**,  $n = 3$ ).

Statistical significance was analysed by one-way ANOVA with Dunnett's multiple comparisons test versus the control group.

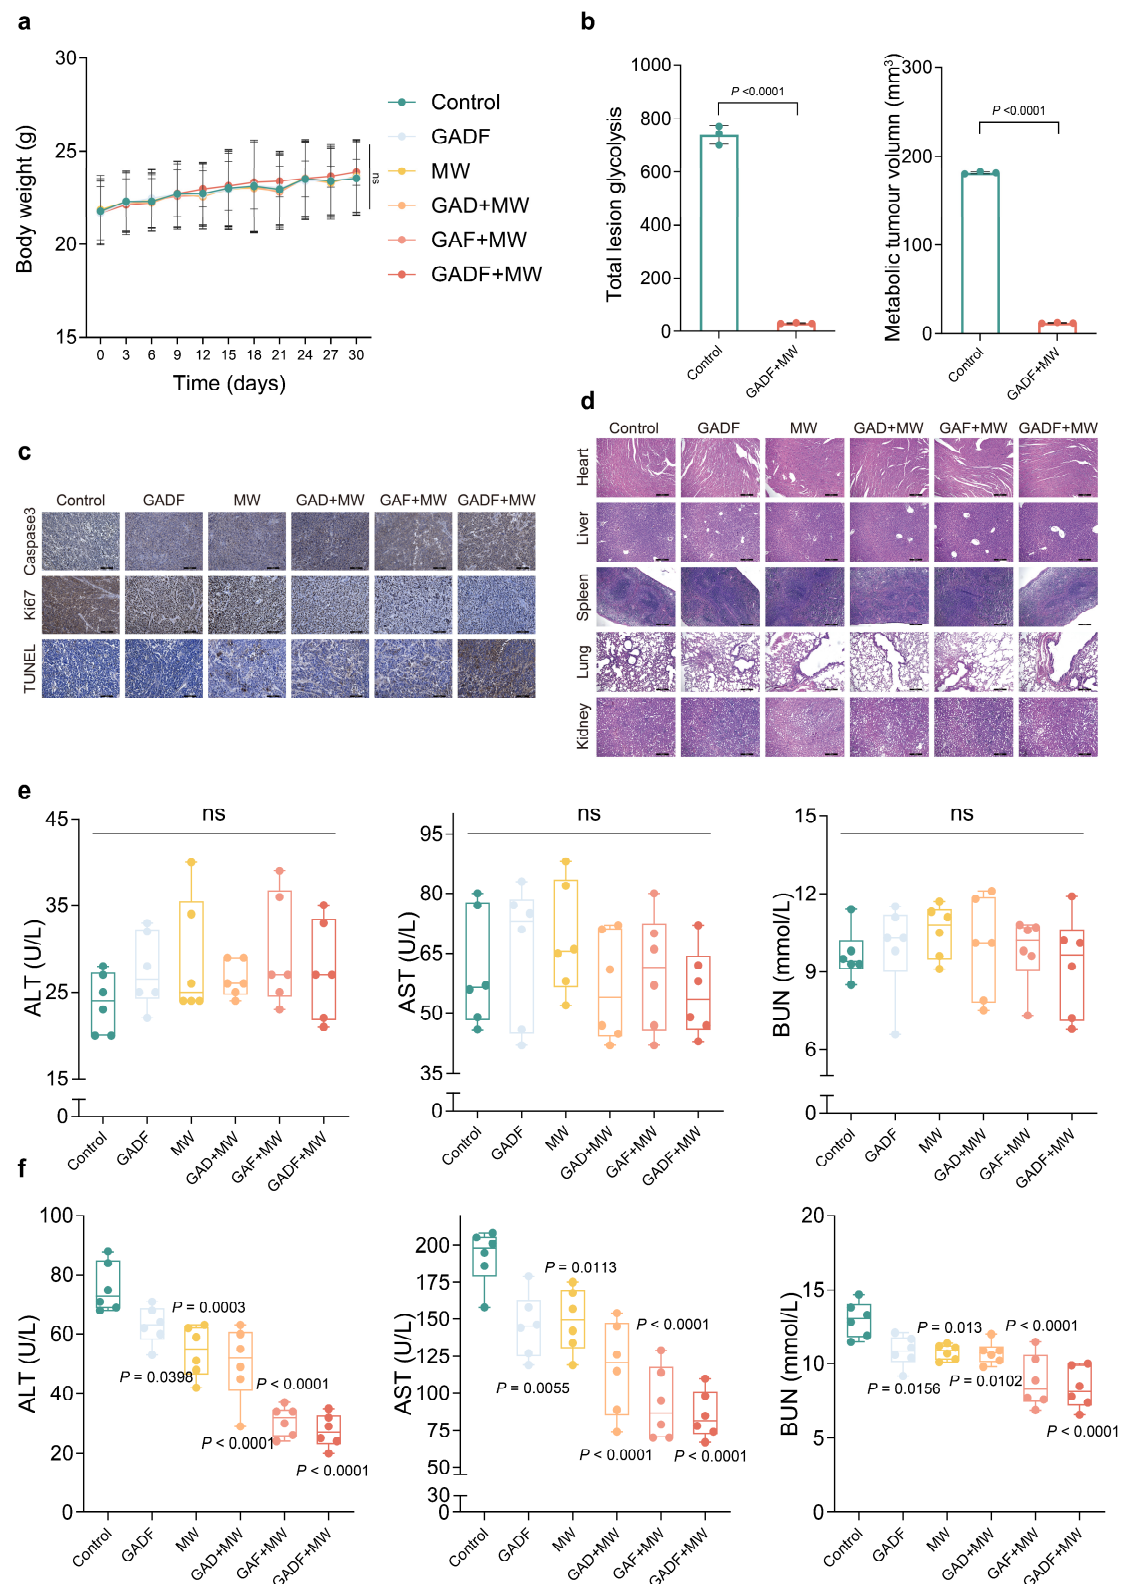

**Supplementary Fig. 6 | In vivo therapeutic efficacy and biosafety validation of GADF combined with MW. Related to Fig. 4.**

**a**, Body weight curves of mice from the subcutaneous model (Fig. 4a).

**b**, Total lesion glycolysis (TLG) and metabolic tumour volume (MTV) for the groups shown in Fig. 4g.

**c**, Representative IHC staining of caspase-3, Ki-67 and TUNEL in tumours across groups.  $n = 6$  mice per group.

**d**, Representative H&E-stained sections of heart, liver, spleen, lung and kidney tissues.  $n = 6$  mice per group.

**e**, Serum ALT, AST, and BUN levels of mice from the subcutaneous model (Fig. 4a).

**f**, Serum ALT, AST, and BUN levels of mice from the orthotopic metastasis model (Fig. 4j).

Data are presented as mean  $\pm$  s.d. from  $n$  biologically independent samples (**a**, **e**, **f**,  $n = 6$ ; **b**,  $n = 3$ ).

Statistical significance was analysed by two-way ANOVA with Dunnett's test for **a**, two-tailed

Student's  $t$ -test for **b**, and one-way ANOVA with Dunnett's test for **e**, **f**. Dunnett's test compared

each group to the control group. (alanine aminotransferase, ALT; aspartate aminotransferase, AST;

blood urea nitrogen, BUN).



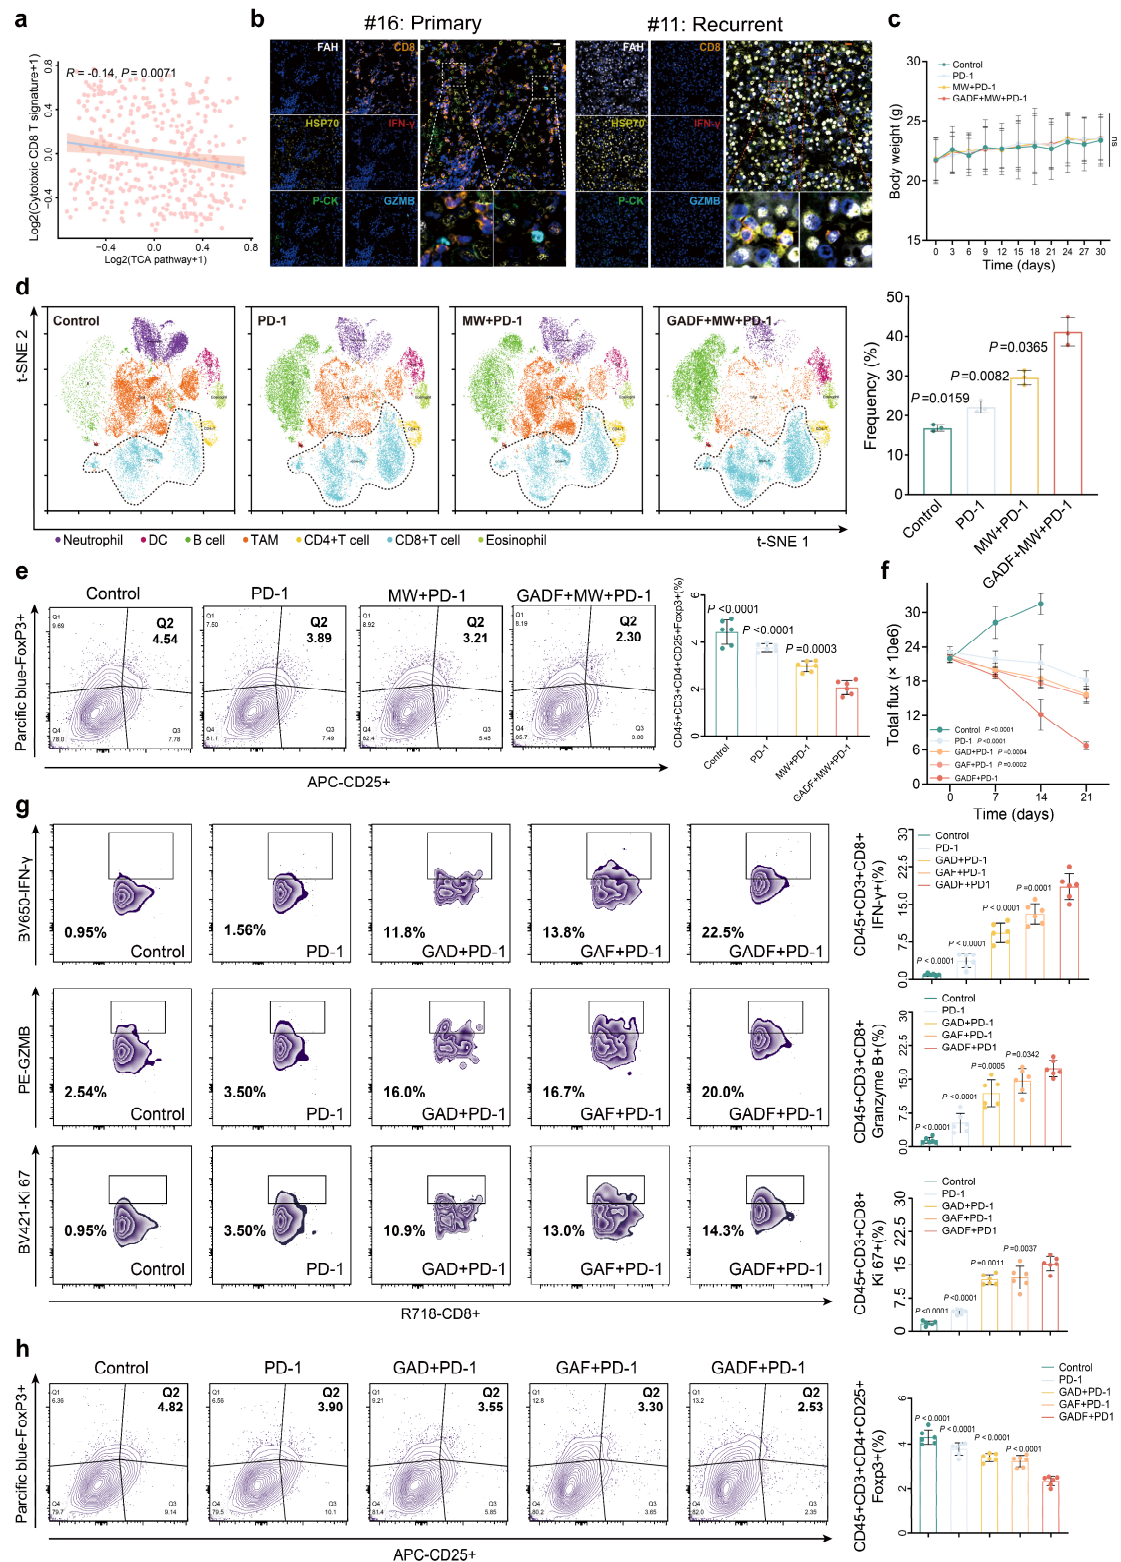

**Supplementary Fig. 7 | GADF combinatorial therapy reinvigorates spatial immune landscapes. Related to Fig. 5.**

**a**, Scatter plot showing the Pearson correlation between TCA pathway activity in tumour cells and a cytotoxic CD8<sup>+</sup> T-cell gene signature in the TCGA-LIHC cohort. Each point represents a patient sample.

**b**, Representative multiplex immunohistochemistry (mIHC) images showing expression of FAH,



HSP70, pan-cytokeratin (P-CK), CD8, IFN- $\gamma$  and GZMB in Cohort 1 tissues. Scale bar, 20  $\mu$ m.

**c**, Body weight curves for mice bearing distal tumours in the bilateral model (Fig. 5b).

**d**, t-SNE plots illustrating tumour-infiltrating immune cell profiles and molecule expression for each treatment group. Colours denote CD8<sup>+</sup> T cells.

**e**, Representative flow cytometry plots and quantitative analysis of FoxP3<sup>+</sup> CD4<sup>+</sup> T cells (Tregs) from distal tumours (Fig. 5b).  $n = 3$ .

**f**, Total bioluminescence flux measurements from the pulmonary metastasis model (Fig. 5j) across groups.

**g**, Representative flow cytometry plots and quantitative analysis of IFN- $\gamma$ <sup>+</sup>, GZMB<sup>+</sup>, Ki-67<sup>+</sup> CD8<sup>+</sup> T cells from the pulmonary metastasis model (Fig. 5j).  $n = 6$ .

**h**, Representative flow cytometry plots and quantitative analysis of FoxP3<sup>+</sup> CD4<sup>+</sup> T cells (Tregs) from Fig. 5j.  $n = 6$ .

Data are presented as mean  $\pm$  s.d. from  $n$  biologically independent samples (**c**, **e-h**,  $n = 6$ ; **d**,  $n = 3$ ). Statistical significance was analysed by two-way ANOVA with Dunnett's test for **c**, mixed effect model with Dunnett's multiple comparisons test for **f**, and one-way ANOVA with Dunnett's test for **e**, **g**, **h**. ns, not significant. Dunnett's test compared each group to the last group.

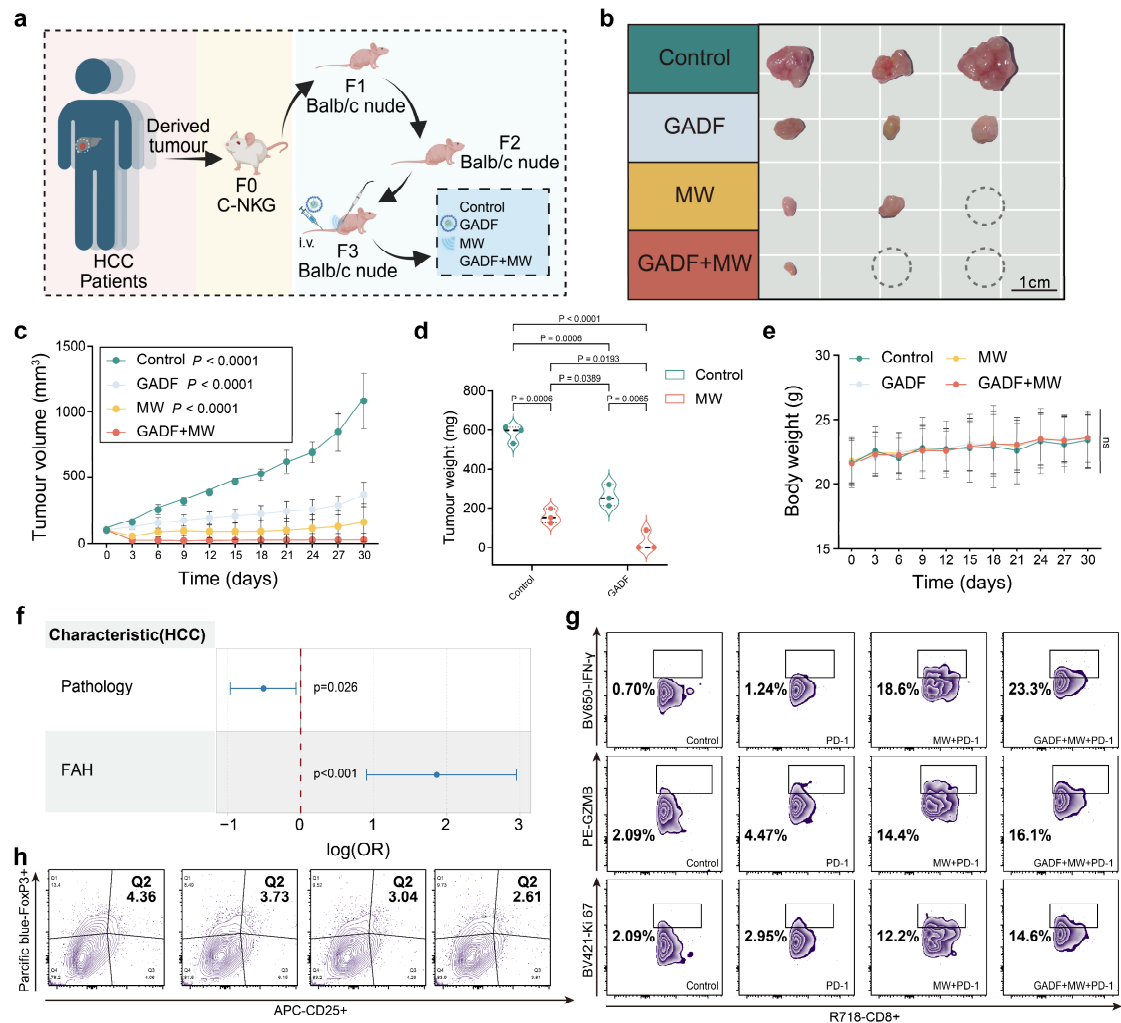

**Supplementary Fig. 8 | Therapeutic efficacy of GADF in PDX models and hazard ratios for FAH. Related to Fig. 6.**

**a**, Schematic of the patient-derived xenograft (PDX) model establishment using recurrent HCC tissue from Cohort 2. The F0 generation was engrafted into C-NKG mice, followed by serial passaging into BALB/c nude mice. Groups: Control, GADF, MW, GADF + MW.

**b**, Representative tumour images from the F3 generation PDX model across groups.  $n = 3$  mice per group.

**c-e**, Tumour volume growth curves (**c**), terminal tumour weights (**d**), and body weight curves (**e**) of F3 PDX mice.

**f**, Forest plot of hazard ratios for HCC recurrence risk factors based on multivariable Cox proportional hazards regression analysis of Cohort 3.

**g, h**, Representative flow cytometry plots (**g**) and quantitative analysis (**h**) of IFN- $\gamma$ <sup>+</sup>, GZMB<sup>+</sup>, Ki-67<sup>+</sup> CD8<sup>+</sup> T cells and FoxP3<sup>+</sup> CD4<sup>+</sup> T cells from the model in Fig. 6l.  $n = 6$  mice per group.

Data are presented as mean  $\pm$  s.d. from  $n$  biologically independent samples (**c, d, e**,  $n = 3$ ; **f, h**,  $n = 108$ ). Statistical significance was analysed by two-way ANOVA with Dunnett's test for **c, e**, two-way ANOVA with Tukey's test for **d**, and Cox proportional hazards regression model for **f**. ns, not significant. Dunnett's test compared each group to the last group. Normality-compliant groups gave significant ANOVA  $p$ -values; violated normality cases showed an overt, complete-regression trend as shown in **c**. Schematic in **a** created with BioRender.com.

**Supplementary Table 1** | Association of FAH expression with clinicopathological features of HCC.

|                  | FAH <sup>high</sup> | FAH <sup>low</sup> | <i>P</i> value  | $\chi^2$ |
|------------------|---------------------|--------------------|-----------------|----------|
| All cases        | 66(61.1%)           | 42(38.9%)          |                 |          |
| Gender           |                     |                    |                 |          |
| Female           | 12(18.2%)           | 7(16.7%)           | 0.8402          | 4.06E-02 |
| Male             | 54(81.8%)           | 35(83.3%)          |                 |          |
| Age              |                     |                    |                 |          |
| >60              | 37(56.1%)           | 20(47.6%)          | 0.43424         | 0.5099   |
| ≤60              | 29(43.9%)           | 22(52.4%)          |                 |          |
| HBsAg            |                     |                    |                 |          |
| Positive         | 49(74.2%)           | 33(78.6%)          | 0.7778          | 0.079603 |
| Negative         | 17(25.8%)           | 9(21.4%)           |                 |          |
| HCV              |                     |                    |                 |          |
| Positive         | 4(6.1%)             | 3(7.1%)            | 0.8238          | 4.96E-02 |
| Negative         | 62(93.9%)           | 39(92.9%)          |                 |          |
| AFP              |                     |                    |                 |          |
| >400             | 12(18.2%)           | 9(21.4%)           | 0.868           | 0.027637 |
| ≤400             | 54(81.8%)           | 33(78.6%)          |                 |          |
| Child-Pugh stage |                     |                    |                 |          |
| A                | 41(62.1%)           | 26(61.9%)          | 0.7199          | 0.65734  |
| B                | 24(36.4%)           | 16(38.1%)          |                 |          |
| C                | 1(1.5%)             | 0(0.0%)            |                 |          |
| BCLC stage       |                     |                    |                 |          |
| 0                | 15(22.7%)           | 4(9.5%)            | 0.2163          | -        |
| A                | 27(40.9%)           | 21(50.0%)          |                 |          |
| B                | 22(33.3%)           | 17(40.5%)          |                 |          |
| C                | 2(3.0%)             | 0(0.0%)            |                 |          |
| Tumour number    |                     |                    |                 |          |
| 1                | 52(78.8%)           | 28(66.7%)          | 0.2044          | -        |
| 2                | 14(21.2%)           | 13(31.0%)          |                 |          |
| 3 or more        | 0(0.0%)             | 1(2.4%)            |                 |          |
| Tumour size (cm) |                     |                    |                 |          |
| >5               | 9(13.6%)            | 3(7.1%)            | 0.4637          | 0.53693  |
| ≤5               | 57(86.4%)           | 39(92.9%)          |                 |          |
| Pathology        |                     |                    |                 |          |
| high             | 34(51.5%)           | 32(76.2%)          | <b>0.02757</b>  | 7.1819   |
| middle           | 1(1.5%)             | 1(2.4%)            |                 |          |
| low              | 31(47%)             | 9(21.4%)           |                 |          |
| Recurrent        |                     |                    |                 |          |
| Yes              | 37(56.1%)           | 6(14.3%)           | <b>3.76E-05</b> | 16.99    |
| No               | 29(43.9%)           | 36(85.7%)          |                 |          |

*P* values were calculated using the Pearson's chi-square test. A *P* value of <0.05 was considered statistically significant. *n* = 108.

**Abbreviations:** HBsAg, hepatitis B surface antigen; AFP, alpha-fetoprotein.

258 **Supplementary Table 2** | Univariate and multivariate analyses of factors associated with  
 259 recurrence in HCC patients.

| Variables     | Recurrent rate |          |                    |                 |              |          |                   |                |
|---------------|----------------|----------|--------------------|-----------------|--------------|----------|-------------------|----------------|
|               | Univariate     |          |                    |                 | Multivariate |          |                   |                |
|               | Coefficient    | OR       | CI                 | <i>P</i> value  | Coefficient  | OR       | CI                | <i>P</i> value |
| FAH           | 2.0354         | 7.655314 | 3.01-22.45         | <b>5.74E-05</b> | 1.8622       | 6.437885 | <b>2.46-19.20</b> | 0.000315       |
| Gender        | 0.6342         | 1.885513 | 0.69-5.21          | 0.213           |              |          |                   |                |
| Age           | 0.0173         | 1.017451 | 0.97-1.07          | 0.459           |              |          |                   |                |
| HBV           | -0.1361        | 0.872755 | 0.36-2.17          | 0.766           |              |          |                   |                |
| HCV           | 1.4218         | 4.144574 | 0.85-29.95         | 0.0989          |              |          |                   |                |
| AFP           | 2.34E-05       | 1.000023 | 0.999935-1.0001303 | 0.5804          |              |          |                   |                |
| Child-Pugh    | 0.04184        | 1.042728 | 0.48-2.23          | 0.914           |              |          |                   |                |
| BCLC          | -0.0382        | 0.962511 | 0.57-1.61          | 0.884           |              |          |                   |                |
| Tumour number | -0.09888       | 0.905851 | 0.38-2.07          | 0.817           |              |          |                   |                |
| Tumour size   | -0.05434       | 0.94711  | 0.75-1.18          | 0.634           |              |          |                   |                |
| Pathology     | -0.6493        | 0.522411 | 0.34-0.79          | <b>0.00209</b>  | -0.5081      | 0.601638 | <b>0.38-0.94</b>  | 0.025643       |

260 Data obtained from the Cox proportional hazards model. A *P* <0.05 was regarded as statistically  
 261 significant.

262 **Abbreviations:** HBsAg, hepatitis B surface antigen; AFP, alpha-fetoprotein.

263

**Supplementary Table 3** | siRNA/shRNA sequences used in this study.

|             | Accession   | Target Seg            |
|-------------|-------------|-----------------------|
| sh-FAH (#1) | NM_000137.4 | TGAAGTCATCATAACAGGGTA |
| sh-FAH (#2) | NM_000137.4 | GCTACCATATGCAAGTCCAAT |
| sh-FAH (#3) | NM_000137.4 | GAGAGTGTTCTTGCAGAACTT |
| si-SP1 (#1) | NM_138473.3 | AAGCGCUUCAUGAGGAGUGTT |
| si-SP1 (#2) | NM_138473.3 | CCAACAGAUUAUCACAAAUTT |
| p53-sgRNA   | -           | CCTCGAGCTCCCTCTGAGCC  |

The target sequence for p53 knockout was derived from Addgene

<https://www.addgene.org/browse/sequence/123311/>

**Supplementary Table 4** | Information of used antibodies.

| Antibodies                                       | Source                    | Dilution                                                        | Identifier |
|--------------------------------------------------|---------------------------|-----------------------------------------------------------------|------------|
| Rabbit anti- FAH polyclonal antibody             | Invitrogen                | 1:400 for mIHC; 0.5 µg/mL for WB; 1:500 for IHC and IF staining | PA5-42049  |
| Mouse anti- HSP70 antibody [5A5]                 | Abcam                     | 1:1000 for WB; 1:100 for IHC and mIHC; 1:400 for IF staining    | ab2787     |
| Rabbit anti-Cyclophilin B Polyclonal Antibody    | Invitrogen                | 1 µg/mL for WB                                                  | PA1-027A   |
| Rabbit anti-HMGB1 recombinant antibody           | Proteintech               | 1:300 for IF staining                                           | 82973-1-RR |
| Rabbit anti-calreticulin Polyclonal antibody     | Proteintech               | 1:300 for IF staining                                           | 27298-1-AP |
| Mouse anti-N-cadherin                            | Proteintech               | 1:7500 for WB; 1:400 for IF staining                            | 66219-1-Ig |
| Mouse anti-E-cadherin                            | Proteintech               | 1:7500 for WB; 1:400 for IF staining                            | 20874-1-AP |
| Rabbit anti- human SP1                           | Abcam                     | 1:5000 for WB; 1:500 for mIHC                                   | ab227383   |
| Cleaved Caspase 3 Polyclonal antibody            | Proteintech               | 1:350 for IHC                                                   | 25128-1-AP |
| Ki-67 Polyclonal antibody                        | Proteintech               | 1:6000 for IHC                                                  | 27309-1-AP |
| CD8α (D8A8Y) Rabbit mAb                          | Cell Signaling TECHNOLOGY | 1:100 for mIHC                                                  | 85336      |
| Pan-Keratin (C11) Mouse mAb                      | Cell Signaling TECHNOLOGY | 1:100 for mIHC                                                  | 4545       |
| IFN-γ (D3H2) XP Rabbit mAb                       | Cell Signaling TECHNOLOGY | 1:100 for mIHC                                                  | 8455       |
| anti- human Granzyme B                           | Cell Signaling TECHNOLOGY | 1:400 for mIHC                                                  | 17215      |
| HRP-conjugated Goat Anti-Rabbit IgG(H+L)         | Proteintech               | 1:5000 for WB                                                   | SA00001-2  |
| HRP-conjugated Goat Anti-Mouse IgG(H+L)          | Proteintech               | 1:5000 for WB                                                   | SA00001-1  |
| CoraLite594-conjugated Goat Anti-Rabbit IgG(H+L) | Proteintech               | 1:300 for IF                                                    | SA00013-4  |
| CoraLite488-conjugated Goat Anti-Rabbit IgG(H+L) | Proteintech               | 1:500 for IF                                                    | SA00013-2  |
| Cy3-conjugated Goat Anti-Rabbit IgG(H+L)         | Proteintech               | 1:50 for IF                                                     | SA00009-2  |
| BV650 Rat Anti-Mouse IFN-γ                       | BD Pharmingen             | 1 µg/mL for FC                                                  | 563854     |
| PE anti-human/mouse Granzyme B Recombinant       | BioLegend                 | 0.5 µg/mL for FC                                                | 372208     |



|                                            |  |  |               |                   |        |
|--------------------------------------------|--|--|---------------|-------------------|--------|
| BV421 Mouse Anti-Ki-67                     |  |  | BD Pharmingen | 1 µg/mL for FC    | 562899 |
| APC-Cy <sup>TM</sup> 7 Rat Anti-Mouse CD45 |  |  | BD Pharmingen | 1 µg/mL for FC    | 557659 |
| FITC Hamster Anti-Mouse CD3e               |  |  | BD Pharmingen | 1 µg/mL for FC    | 553061 |
| R718 Rat Anti-Mouse CD8a                   |  |  | BD Pharmingen | 1 µg/mL for FC    | 566985 |
| FITC Anti-Mouse CD3e                       |  |  | BioLegend     | 1 µg/mL for FC    | 100204 |
| Brilliant Violet 510M Rat Anti-Mouse CD45  |  |  | BioLegend     | 0.5 µg/mL for FC  | 103138 |
| PE/Cyanine Rat Anti-Mouse CD4              |  |  | BioLegend     | 0.25 µg/mL for FC | 116016 |
| Pacific blue anti-FOXP3                    |  |  | BioLegend     | 0.5 µg/mL for FC  | 126410 |
| APC anti-CD25                              |  |  | BioLegend     | 0.25 µg/mL for FC | 112012 |
| In Vivo MAb anti-mouse PD-1 (CD279)        |  |  | Bioxcell      | NA                | BE0146 |
| In vivo mAb rat IgG2a isotype control      |  |  | Bioxcell      | NA                | BE0089 |

270     **Supplementary Table 5** | Primers for quantitative real-time PCR.

| Primers      | 5' to 3'             |
|--------------|----------------------|
| β-Tubulin qF | TGGATCCCCAACAATGTCAA |
| β-Tubulin qR | GGCTGTGCTATTGCCAATGA |
| FAH qF       | CACCTTCCAGCCACCATAGG |
| FAH qR       | CAATTTGGCATCAACGCATT |

271
